# Supplementary figures and images for: Activation of natriuretic peptides and the sympathetic nervous system following Roux-en-Y gastric bypass is associated with gonadal adipose tissues browning
Source: PubMed Central journal article supplement — Mol Metab. 2015 Mar 3;4(5):427–36. doi: 10.1016/j.molmet.2015.02.006 (PMC4421080; doi:10.1016/j.molmet.2015.02.006), 2015-03-03

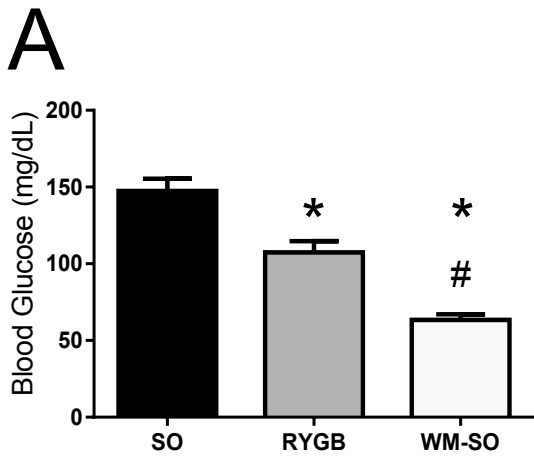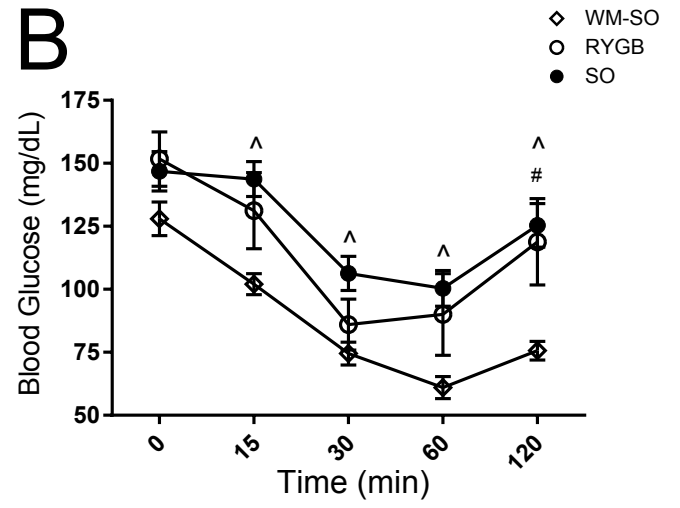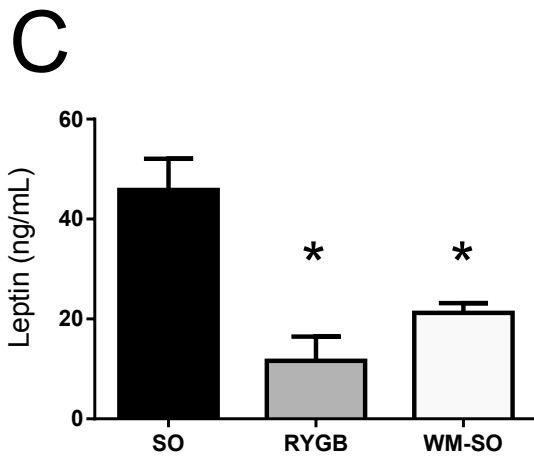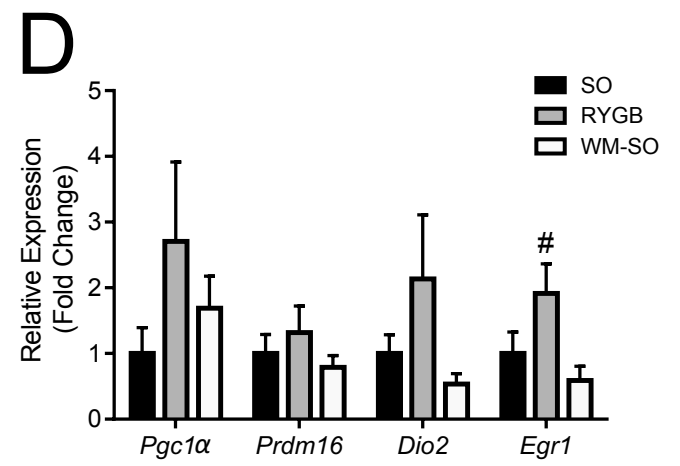

Supplement: mmc1.pdf [file mmc1.pdf]
